# Supplementary material for: Deletion of a Malaria Invasion Gene Reduces Death and Anemia, in Model Hosts
Source: PLoS One. 2011 Sep 28;6(9):e25477. doi: 10.1371/journal.pone.0025477 (PMC3182240; doi:10.1371/journal.pone.0025477)
Supplement: Figure S5 — Raw data for rat cytokine analysis. The complete 59 analyte panel of the version 2.0 Rodent MAP profiling from Rules Based Medicine, Inc was tested in plasma drawn on day 8 and day 10 of rats infected with wild type parasites or Δmsp7 mutants. (XLS) [file pone.0025477.s005.xls]

## Sheet: Rodent Antigens 2.0-Rat
			Test Profile				Rodent MAP v2.0 - Antigens											Author		MC
			RBM Order				107339											Date		2010-03-16
			Customer				University of Notre Dame											Reviewer		SB
			Group Designation				Rat SMA Plasma											Date		2010-03-17
			Study				R_SMA#4
			Investigator				Noe D. Gomez
			Date Received				2010-03-11
			Date Testing Completed				2010-03-15
			Samples				20	Rat			Plasma			Heparin
	Analytes		Apolipoprotein A-I (Apo A-I)	CD40 (CD40)	CD40 Ligand (CD40-L)	C-Reactive Protein Rat (CRP Rat)	Endothelin-1 (ET-1)	Eotaxin	Epidermal Growth Factor Mouse (EGF Mouse)	Factor VII	Fibrinogen	Fibroblast Growth Factor 9 (FGF-9)	Fibroblast Growth Factor basic (FGF-basic)	Glutathione S-Transferase alpha (GST-alpha)	Granulocyte Chemotactic Protein-2 Rat (GCP-2 Rat)	Granulocyte-Macrophage Colony-Stimulating Factor (GM-CSF)	Growth-Regulated Alpha Protein (KC/GRO)	Haptoglobin	Immunoglobulin A (IgA)	Interferon gamma (IFN-gamma)	Interferon gamma Induced Protein 10 (IP-10)	Interleukin-1 alpha (IL-1 alpha)	Interleukin-1 beta (IL-1 beta)	Interleukin-10 (IL-10)	Interleukin-11 (IL-11)	Interleukin-12 Subunit p70 (IL-12p70)	Interleukin-17A (IL-17A)	Interleukin-18 (IL-18)	Interleukin-2 (IL-2)	Interleukin-3 (IL-3)	Interleukin-4 (IL-4)	Interleukin-5 (IL-5)	Interleukin-6 (IL-6)	Interleukin-7 (IL-7)	Leukemia Inhibitory Factor (LIF)	Lymphotactin	Macrophage Colony-Stimulating Factor-1 (M-CSF-1)	Macrophage Inflammatory Protein-1 alpha (MIP-1 alpha)	Macrophage Inflammatory Protein-1 beta (MIP-1 beta)	Macrophage Inflammatory Protein-1 gamma Rat (MIP-1 gamma Rat)	Macrophage Inflammatory Protein-2 (MIP-2)	Macrophage Inflammatory Protein-3 beta (MIP-3 beta)	Macrophage-Derived Chemokine (MDC)	Matrix Metalloproteinase-9 (MMP-9)	Monocyte Chemotactic Protein 1 (MCP-1)	Monocyte Chemotactic Protein 3 (MCP-3)	Monocyte Chemotactic Protein-5 (MCP-5)	Myeloperoxidase (MPO)	Myoglobin
	Units		ug/mL	pg/mL	pg/mL	ug/mL	pg/mL	pg/mL	pg/mL	ng/mL	ug/mL	ng/mL	ng/mL	ng/mL	ng/mL	pg/mL	ng/mL	ug/mL	ug/mL	pg/mL	pg/mL	pg/mL	ng/mL	pg/mL	pg/mL	ng/mL	ng/mL	ng/mL	pg/mL	pg/mL	pg/mL	ng/mL	pg/mL	ng/mL	pg/mL	pg/mL	ng/mL	ng/mL	pg/mL	ng/mL	pg/mL	ng/mL	pg/mL	ng/mL	pg/mL	pg/mL	pg/mL	ng/mL	ng/mL
	Least Detectable Dose		10.4	12	92	0.83	66.95	12.25	39.1	0.958	170	0.9926	0.577	0.42	0.0245	8.746	0.1739	0.64	1.89	67.82	40.28	44.92	0.447	109.26	87.38	0.5712	0.152	0.674	67	21.274	73.54	0.194	13.852	0.309	43.6	85.48	0.01795	0.2255	77.66	0.0736	7.174	0.465	21.85	10	16.924	31.36	46.38	0.95	24
	Samples
1	1A		<LOW>	<LOW>	523	319	<LOW>	994	14.6	20.3	73500	0.43	5.14	<LOW>	0.0245	<LOW>	0.0439	76.9	5.39	<LOW>	330	30.7	<LOW>	<LOW>	468	<LOW>	<LOW>	<LOW>	13.8	<LOW>	<LOW>	<LOW>	<LOW>	0.243	694	30.4	1.48	2.18	968	<LOW>	5.77	0.683	433	<LOW>	1340	863	<LOW>	42.4	2110
2	2A		<LOW>	<LOW>	<LOW>	361	<LOW>	927	11	18.3	94900	<LOW>	3.61	20	0.0214	<LOW>	0.0368	589	4.77	<LOW>	291	50.8	<LOW>	<LOW>	544	<LOW>	<LOW>	0.544	<LOW>	<LOW>	<LOW>	<LOW>	<LOW>	0.257	802	40.4	1.55	1.67	1110	<LOW>	5.21	11.5	428	<LOW>	1490	1030	1.04	39.8	1220
3	3A		<LOW>	<LOW>	1260	313	<LOW>	481	14.6	16.2	80900	<LOW>	5.91	11.8	0.031	<LOW>	<LOW>	402	4.53	<LOW>	108	30.7	<LOW>	<LOW>	159	<LOW>	<LOW>	<LOW>	<LOW>	<LOW>	<LOW>	<LOW>	<LOW>	0.298	766	22.7	1.27	1.8	199	0.00618	<LOW>	1.65	361	<LOW>	497	455	1.76	21.6	238
4	4A		<LOW>	<LOW>	<LOW>	400	<LOW>	391	12.8	18.3	102000	<LOW>	3.61	3.56	0.0182	<LOW>	<LOW>	1050	4.46	5.64	122	906	<LOW>	<LOW>	1120	<LOW>	<LOW>	<LOW>	<LOW>	<LOW>	<LOW>	<LOW>	<LOW>	1.33	658	33	1.63	1.93	505	<LOW>	<LOW>	2.83	211	<LOW>	608	395	<LOW>	27.8	680
5	1B		<LOW>	<LOW>	1780	371	<LOW>	499	9.15	14.2	100000	<LOW>	5.14	49.5	0.00909	<LOW>	<LOW>	1110	12	<LOW>	129	8.76	<LOW>	<LOW>	81.1	<LOW>	<LOW>	<LOW>	<LOW>	<LOW>	<LOW>	<LOW>	<LOW>	0.139	533	14.5	1.12	1.67	1800	<LOW>	<LOW>	0.242	207	<LOW>	588	326	<LOW>	38.1	337
6	2B		<LOW>	<LOW>	<LOW>	280	<LOW>	741	16.4	20.3	29600	<LOW>	5.91	11.5	0.0214	<LOW>	<LOW>	337	<LOW>	<LOW>	132	8.76	<LOW>	<LOW>	302	<LOW>	<LOW>	<LOW>	<LOW>	<LOW>	<LOW>	<LOW>	<LOW>	0.27	712	31.7	1.35	1.8	721	<LOW>	6.86	17.6	357	<LOW>	900	612	1.04	39.4	3850
7	3B		<LOW>	<LOW>	<LOW>	405	<LOW>	549	11	14.2	80900	<LOW>	4.37	<LOW>	0.0407	<LOW>	<LOW>	1070	13.3	<LOW>	75.3	8.76	<LOW>	<LOW>	190	<LOW>	<LOW>	<LOW>	<LOW>	<LOW>	<LOW>	<LOW>	<LOW>	0.284	658	14.5	1.23	1.8	743	<LOW>	5.77	0.42	202	<LOW>	512	300	<LOW>	41.4	1530
8	4B		<LOW>	<LOW>	<LOW>	230	<LOW>	370	13.7	16.2	82300	<LOW>	4.37	35	0.0245	<LOW>	<LOW>	152	3.52	<LOW>	105	8.76	<LOW>	<LOW>	302	<LOW>	<LOW>	<LOW>	<LOW>	<LOW>	<LOW>	<LOW>	<LOW>	0.229	802	37.9	1.38	1.6	657	<LOW>	7.93	3.42	177	<LOW>	452	313	<LOW>	32.5	33.2
9	1C		<LOW>	<LOW>	<LOW>	360	<LOW>	605	14.6	20.3	52700	1.14	5.14	0.259	0.0569	<LOW>	<LOW>	866	<LOW>	<LOW>	70.7	8.76	<LOW>	<LOW>	296	<LOW>	<LOW>	0.544	<LOW>	<LOW>	<LOW>	<LOW>	<LOW>	0.188	623	25.3	0.747	2.18	202	<LOW>	<LOW>	0.345	456	<LOW>	514	303	<LOW>	11.6	946
10	2C		<LOW>	<LOW>	<LOW>	302	<LOW>	596	14.6	18.3	67700	<LOW>	3.61	51.1	0.0182	<LOW>	<LOW>	726	8.81	<LOW>	99.5	30.7	16.4	<LOW>	111	<LOW>	<LOW>	<LOW>	<LOW>	<LOW>	<LOW>	<LOW>	<LOW>	0.188	730	35.5	1.46	1.67	383	<LOW>	<LOW>	0.636	352	<LOW>	758	533	<LOW>	26.9	79.8
11	3C		<LOW>	<LOW>	<LOW>	413	<LOW>	477	9.15	14.2	91400	<LOW>	3.61	1.65	0.0602	<LOW>	<LOW>	966	5.4	<LOW>	75.3	30.7	<LOW>	<LOW>	141	<LOW>	<LOW>	<LOW>	<LOW>	<LOW>	<LOW>	<LOW>	<LOW>	0.311	802	30.4	1.25	1.6	587	<LOW>	14.9	0.613	284	<LOW>	505	314	<LOW>	28.6	1390
12	4C		<LOW>	<LOW>	681	455	<LOW>	568	11	12.1	93100	<LOW>	2.86	14	0.044	<LOW>	<LOW>	1150	5.05	<LOW>	78.3	<LOW>	<LOW>	<LOW>	240	<LOW>	<LOW>	<LOW>	<LOW>	<LOW>	<LOW>	<LOW>	<LOW>	0.651	623	27.9	0.989	1.53	262	<LOW>	5.77	0.589	342	<LOW>	455	324	1.04	21.1	2070
13	1D		<LOW>	<LOW>	<LOW>	277	<LOW>	356	11	12.1	85200	<LOW>	3.61	15.9	0.0136	<LOW>	<LOW>	753	7.71	<LOW>	93.5	30.7	<LOW>	<LOW>	246	<LOW>	<LOW>	<LOW>	<LOW>	<LOW>	<LOW>	<LOW>	<LOW>	0.215	605	25.3	1.3	1.53	371	<LOW>	4.64	0.294	328	<LOW>	564	376	<LOW>	19.9	2410
14	2D		<LOW>	<LOW>	<LOW>	330	<LOW>	595	12.8	16.2	77100	0.811	3.61	<LOW>	0.0106	<LOW>	<LOW>	110	2.52	<LOW>	137	30.7	<LOW>	81.9	265	<LOW>	<LOW>	<LOW>	<LOW>	<LOW>	<LOW>	<LOW>	<LOW>	0.208	910	27.9	1.39	1.53	610	<LOW>	5.77	0.493	359	<LOW>	1060	601	<LOW>	32.7	407
15	3D		<LOW>	<LOW>	277	410	<LOW>	411	11.9	12.1	112000	<LOW>	3.61	<LOW>	0.031	<LOW>	<LOW>	1400	8.69	<LOW>	80.6	8.76	<LOW>	<LOW>	165	<LOW>	<LOW>	<LOW>	<LOW>	<LOW>	<LOW>	<LOW>	<LOW>	0.208	551	52.6	1.45	1.39	253	<LOW>	4.06	4.03	357	<LOW>	554	390	<LOW>	21.8	404
16	4D		<LOW>	<LOW>	3030	517	<LOW>	620	9.15	14.2	116000	<LOW>	5.91	4.8	0.101	<LOW>	<LOW>	1600	22.8	<LOW>	128	113	<LOW>	<LOW>	861	<LOW>	<LOW>	<LOW>	<LOW>	<LOW>	<LOW>	<LOW>	<LOW>	0.407	2780	122	1.36	7.35	848	<LOW>	31.9	3.38	468	4.13	373	307	<LOW>	33.9	86.5
17	1E		<LOW>	<LOW>	<LOW>	405	<LOW>	968	9.15	18.3	43800	0.43	5.52	<LOW>	0.0586	<LOW>	<LOW>	968	2.61	<LOW>	66.9	<LOW>	<LOW>	<LOW>	353	<LOW>	<LOW>	<LOW>	<LOW>	<LOW>	<LOW>	<LOW>	<LOW>	0.132	766	25.3	0.726	1.87	196	<LOW>	<LOW>	0.493	738	<LOW>	537	434	1.04	7.72	419
18	2E		<LOW>	<LOW>	<LOW>	426	<LOW>	1190	11	20.3	51200	0.43	5.14	<LOW>	0.0342	<LOW>	<LOW>	1120	2.99	<LOW>	61.5	8.76	<LOW>	<LOW>	391	<LOW>	<LOW>	<LOW>	<LOW>	<LOW>	<LOW>	<LOW>	<LOW>	0.188	766	25.3	0.791	1.8	193	<LOW>	6.32	0.444	466	<LOW>	509	441	1.04	10.5	582
19	3E		<LOW>	<LOW>	<LOW>	399	<LOW>	902	9.15	22.3	57900	0.811	4.76	<LOW>	0.0489	<LOW>	<LOW>	1040	3.31	<LOW>	58.4	8.76	<LOW>	81.9	215	<LOW>	<LOW>	<LOW>	<LOW>	<LOW>	<LOW>	<LOW>	<LOW>	0.215	766	22.7	0.623	2.77	216	<LOW>	<LOW>	0.636	419	<LOW>	402	371	<LOW>	6.2	1190
20	4E		<LOW>	<LOW>	<LOW>	408	<LOW>	997	12.8	18.3	55000	0.43	3.99	<LOW>	0.0342	<LOW>	<LOW>	1240	9.31	<LOW>	58.4	<LOW>	<LOW>	81.9	221	<LOW>	<LOW>	1.21	<LOW>	<LOW>	<LOW>	<LOW>	<LOW>	0.132	694	20.1	0.77	1.8	165	<LOW>	<LOW>	0.345	414	<LOW>	423	390	0.608	12.5	60.8
			Comments
			The least detectable dose (LDD) was determined as the mean + 3 standard deviations of 20 blank readings. Results below the LDD will be more variable than results above the LDD. <LOW> values reflect samples not measurable on the standard curve.
[truncated: 12 more columns]

## Sheet: RatSMA_4
	Analytes	Apolipoprotein A-I (Apo A-I)	CD40 (CD40)	CD40 Ligand (CD40-L)	C-Reactive Protein Rat (CRP Rat)	Endothelin-1 (ET-1)	Eotaxin	Epidermal Growth Factor Mouse (EGF Mouse)	Factor VII	Fibrinogen	Fibroblast Growth Factor 9 (FGF-9)	Fibroblast Growth Factor basic (FGF-basic)	Glutathione S-Transferase alpha (GST-alpha)	Granulocyte Chemotactic Protein-2 Rat (GCP-2 Rat)	Granulocyte-Macrophage Colony-Stimulating Factor (GM-CSF)	Growth-Regulated Alpha Protein (KC/GRO)	Haptoglobin	Immunoglobulin A (IgA)	Interferon gamma (IFN-gamma)	Interferon gamma Induced Protein 10 (IP-10)	Interleukin-1 alpha (IL-1 alpha)	Interleukin-1 beta (IL-1 beta)	Interleukin-10 (IL-10)	Interleukin-11 (IL-11)	Interleukin-12 Subunit p70 (IL-12p70)	Interleukin-17A (IL-17A)	Interleukin-18 (IL-18)	Interleukin-2 (IL-2)	Interleukin-3 (IL-3)	Interleukin-4 (IL-4)	Interleukin-5 (IL-5)	Interleukin-6 (IL-6)	Interleukin-7 (IL-7)	Leukemia Inhibitory Factor (LIF)	Lymphotactin	Macrophage Colony-Stimulating Factor-1 (M-CSF-1)	Macrophage Inflammatory Protein-1 alpha (MIP-1 alpha)	Macrophage Inflammatory Protein-1 beta (MIP-1 beta)	Macrophage Inflammatory Protein-1 gamma Rat (MIP-1 gamma Rat)	Macrophage Inflammatory Protein-2 (MIP-2)	Macrophage Inflammatory Protein-3 beta (MIP-3 beta)	Macrophage-Derived Chemokine (MDC)	Matrix Metalloproteinase-9 (MMP-9)	Monocyte Chemotactic Protein 1 (MCP-1)	Monocyte Chemotactic Protein 3 (MCP-3)	Monocyte Chemotactic Protein-5 (MCP-5)	Myeloperoxidase (MPO)	Myoglobin	Oncostatin-M (OSM)
	Units	ug/mL	pg/mL	pg/mL	ug/mL	pg/mL	pg/mL	pg/mL	ng/mL	ug/mL	ng/mL	ng/mL	ng/mL	ng/mL	pg/mL	ng/mL	ug/mL	ug/mL	pg/mL	pg/mL	pg/mL	ng/mL	pg/mL	pg/mL	ng/mL	ng/mL	ng/mL	pg/mL	pg/mL	pg/mL	ng/mL	pg/mL	ng/mL	pg/mL	pg/mL	ng/mL	ng/mL	pg/mL	ng/mL	pg/mL	ng/mL	pg/mL	ng/mL	pg/mL	pg/mL	pg/mL	ng/mL	ng/mL	ng/mL
	Least Detectable Dose	10.4	12	92	0.83	66.95	12.25	39.1	0.958	170	0.9926	0.577	0.42	0.0245	8.746	0.1739	0.64	1.89	67.82	40.28	44.92	0.447	109.26	87.38	0.5712	0.152	0.674	67	21.274	73.54	0.194	13.852	0.309	43.6	85.48	0.01795	0.2255	77.66	0.0736	7.174	0.465	21.85	10	16.924	31.36	46.38	0.95	24	0.13
	Samples
1	1A	<LOW>	<LOW>	523	319	<LOW>	994	14.6	20.3	73500	0.43	5.14	<LOW>	0.0245	<LOW>	0.0439	76.9	5.39	<LOW>	330	30.7	<LOW>	<LOW>	468	<LOW>	<LOW>	<LOW>	13.8	<LOW>	<LOW>	<LOW>	<LOW>	0.243	694	30.4	1.48	2.18	968	<LOW>	5.77	0.683	433	<LOW>	1340	863	<LOW>	42.4	2110	0.241
2	2A	<LOW>	<LOW>	<LOW>	361	<LOW>	927	11	18.3	94900	<LOW>	3.61	20	0.0214	<LOW>	0.0368	589	4.77	<LOW>	291	50.8	<LOW>	<LOW>	544	<LOW>	<LOW>	0.544	<LOW>	<LOW>	<LOW>	<LOW>	<LOW>	0.257	802	40.4	1.55	1.67	1110	<LOW>	5.21	11.5	428	<LOW>	1490	1030	1.04	39.8	1220	0.544
5	1B*	<LOW>	<LOW>	1780	371	<LOW>	499	9.15	14.2	100000	<LOW>	5.14	49.5	0.00909	<LOW>	<LOW>	1110	12	<LOW>	129	8.76	<LOW>	<LOW>	81.1	<LOW>	<LOW>	<LOW>	<LOW>	<LOW>	<LOW>	<LOW>	<LOW>	0.139	533	14.5	1.12	1.67	1800	<LOW>	<LOW>	0.242	207	<LOW>	588	326	<LOW>	38.1	337	0.11
6	2B	<LOW>	<LOW>	<LOW>	280	<LOW>	741	16.4	20.3	29600	<LOW>	5.91	11.5	0.0214	<LOW>	<LOW>	337	<LOW>	<LOW>	132	8.76	<LOW>	<LOW>	302	<LOW>	<LOW>	<LOW>	<LOW>	<LOW>	<LOW>	<LOW>	<LOW>	0.27	712	31.7	1.35	1.8	721	<LOW>	6.86	17.6	357	<LOW>	900	612	1.04	39.4	3850	0.775
9	1C**/***
10	2C	<LOW>	<LOW>	<LOW>	302	<LOW>	596	14.6	18.3	67700	<LOW>	3.61	51.1	0.0182	<LOW>	<LOW>	726	8.81	<LOW>	99.5	30.7	16.4	<LOW>	111	<LOW>	<LOW>	<LOW>	<LOW>	<LOW>	<LOW>	<LOW>	<LOW>	0.188	730	35.5	1.46	1.67	383	<LOW>	<LOW>	0.636	352	<LOW>	758	533	<LOW>	26.9	79.8	0.268
13	1D	<LOW>	<LOW>	<LOW>	277	<LOW>	356	11	12.1	85200	<LOW>	3.61	15.9	0.0136	<LOW>	<LOW>	753	7.71	<LOW>	93.5	30.7	<LOW>	<LOW>	246	<LOW>	<LOW>	<LOW>	<LOW>	<LOW>	<LOW>	<LOW>	<LOW>	0.215	605	25.3	1.3	1.53	371	<LOW>	4.64	0.294	328	<LOW>	564	376	<LOW>	19.9	2410	0.268
14	2D	<LOW>	<LOW>	<LOW>	330	<LOW>	595	12.8	16.2	77100	0.811	3.61	<LOW>	0.0106	<LOW>	<LOW>	110	2.52	<LOW>	137	30.7	<LOW>	81.9	265	<LOW>	<LOW>	<LOW>	<LOW>	<LOW>	<LOW>	<LOW>	<LOW>	0.208	910	27.9	1.39	1.53	610	<LOW>	5.77	0.493	359	<LOW>	1060	601	<LOW>	32.7	407	0.287
3	3A	<LOW>	<LOW>	1260	313	<LOW>	481	14.6	16.2	80900	<LOW>	5.91	11.8	0.031	<LOW>	<LOW>	402	4.53	<LOW>	108	30.7	<LOW>	<LOW>	159	<LOW>	<LOW>	<LOW>	<LOW>	<LOW>	<LOW>	<LOW>	<LOW>	0.298	766	22.7	1.27	1.8	199	0.00618	<LOW>	1.65	361	<LOW>	497	455	1.76	21.6	238	0.296
4	4A	<LOW>	<LOW>	<LOW>	400	<LOW>	391	12.8	18.3	102000	<LOW>	3.61	3.56	0.0182	<LOW>	<LOW>	1050	4.46	5.64	122	906	<LOW>	<LOW>	1120	<LOW>	<LOW>	<LOW>	<LOW>	<LOW>	<LOW>	<LOW>	<LOW>	1.33	658	33	1.63	1.93	505	<LOW>	<LOW>	2.83	211	<LOW>	608	395	<LOW>	27.8	680	0.277
7	3B**	<LOW>	<LOW>	<LOW>	405	<LOW>	549	11	14.2	80900	<LOW>	4.37	<LOW>	0.0407	<LOW>	<LOW>	1070	13.3	<LOW>	75.3	8.76	<LOW>	<LOW>	190	<LOW>	<LOW>	<LOW>	<LOW>	<LOW>	<LOW>	<LOW>	<LOW>	0.284	658	14.5	1.23	1.8	743	<LOW>	5.77	0.42	202	<LOW>	512	300	<LOW>	41.4	1530	0.222
8	4B	<LOW>	<LOW>	<LOW>	230	<LOW>	370	13.7	16.2	82300	<LOW>	4.37	35	0.0245	<LOW>	<LOW>	152	3.52	<LOW>	105	8.76	<LOW>	<LOW>	302	<LOW>	<LOW>	<LOW>	<LOW>	<LOW>	<LOW>	<LOW>	<LOW>	0.229	802	37.9	1.38	1.6	657	<LOW>	7.93	3.42	177	<LOW>	452	313	<LOW>	32.5	33.2	0.296
11	3C	<LOW>	<LOW>	<LOW>	413	<LOW>	477	9.15	14.2	91400	<LOW>	3.61	1.65	0.0602	<LOW>	<LOW>	966	5.4	<LOW>	75.3	30.7	<LOW>	<LOW>	141	<LOW>	<LOW>	<LOW>	<LOW>	<LOW>	<LOW>	<LOW>	<LOW>	0.311	802	30.4	1.25	1.6	587	<LOW>	14.9	0.613	284	<LOW>	505	314	<LOW>	28.6	1390	0.397
12	4C	<LOW>	<LOW>	681	455	<LOW>	568	11	12.1	93100	<LOW>	2.86	14	0.044	<LOW>	<LOW>	1150	5.05	<LOW>	78.3	<LOW>	<LOW>	<LOW>	240	<LOW>	<LOW>	<LOW>	<LOW>	<LOW>	<LOW>	<LOW>	<LOW>	0.651	623	27.9	0.989	1.53	262	<LOW>	5.77	0.589	342	<LOW>	455	324	1.04	21.1	2070	0.351
15	3D	<LOW>	<LOW>	277	410	<LOW>	411	11.9	12.1	112000	<LOW>	3.61	<LOW>	0.031	<LOW>	<LOW>	1400	8.69	<LOW>	80.6	8.76	<LOW>	<LOW>	165	<LOW>	<LOW>	<LOW>	<LOW>	<LOW>	<LOW>	<LOW>	<LOW>	0.208	551	52.6	1.45	1.39	253	<LOW>	4.06	4.03	357	<LOW>	554	390	<LOW>	21.8	404	0.259
16	4D	<LOW>	<LOW>	3030	517	<LOW>	620	9.15	14.2	116000	<LOW>	5.91	4.8	0.101	<LOW>	<LOW>	1600	22.8	<LOW>	128	113	<LOW>	<LOW>	861	<LOW>	<LOW>	<LOW>	<LOW>	<LOW>	<LOW>	<LOW>	<LOW>	0.407	2780	122	1.36	7.35	848	<LOW>	31.9	3.38	468	4.13	373	307	<LOW>	33.9	86.5	0.701
17	1E	<LOW>	<LOW>	<LOW>	405	<LOW>	968	9.15	18.3	43800	0.43	5.52	<LOW>	0.0586	<LOW>	<LOW>	968	2.61	<LOW>	66.9	<LOW>	<LOW>	<LOW>	353	<LOW>	<LOW>	<LOW>	<LOW>	<LOW>	<LOW>	<LOW>	<LOW>	0.132	766	25.3	0.726	1.87	196	<LOW>	<LOW>	0.493	738	<LOW>	537	434	1.04	7.72	419	0.517
18	2E	<LOW>	<LOW>	<LOW>	426	<LOW>	1190	11	20.3	51200	0.43	5.14	<LOW>	0.0342	<LOW>	<LOW>	1120	2.99	<LOW>	61.5	8.76	<LOW>	<LOW>	391	<LOW>	<LOW>	<LOW>	<LOW>	<LOW>	<LOW>	<LOW>	<LOW>	0.188	766	25.3	0.791	1.8	193	<LOW>	6.32	0.444	466	<LOW>	509	441	1.04	10.5	582	0.222
19	3E	<LOW>	<LOW>	<LOW>	399	<LOW>	902	9.15	22.3	57900	0.811	4.76	<LOW>	0.0489	<LOW>	<LOW>	1040	3.31	<LOW>	58.4	8.76	<LOW>	81.9	215	<LOW>	<LOW>	<LOW>	<LOW>	<LOW>	<LOW>	<LOW>	<LOW>	0.215	766	22.7	0.623	2.77	216	<LOW>	<LOW>	0.636	419	<LOW>	402	371	<LOW>	6.2	1190	0.231
20	4E	<LOW>	<LOW>	<LOW>	408	<LOW>	997	12.8	18.3	55000	0.43	3.99	<LOW>	0.0342	<LOW>	<LOW>	1240	9.31	<LOW>	58.4	<LOW>	<LOW>	81.9	221	<LOW>	<LOW>	1.21	<LOW>	<LOW>	<LOW>	<LOW>	<LOW>	0.132	694	20.1	0.77	1.8	165	<LOW>	<LOW>	0.345	414	<LOW>	423	390	0.608	12.5	60.8	0.351
Averages	UI	#DIV/0!	#DIV/0!	#DIV/0!	409.5	#DIV/0!	1014.25	10.525	19.8	51975	0.52525	4.8525	#DIV/0!	0.043975	#DIV/0!	#DIV/0!	1092	4.555	#DIV/0!	61.3	8.76	#DIV/0!	81.9	295	#DIV/0!	#DIV/0!	1.21	#DIV/0!	#DIV/0!	#DIV/0!	#DIV/0!	#DIV/0!	0.16675	748	23.35	0.7275	2.06	192.5	#DIV/0!	6.32	0.4795	509.25	#DIV/0!	467.75	409	0.896	9.23	562.95	0.33025
	Wt-D8	#DIV/0!	#DIV/0!	1151.5	332.75	#DIV/0!	790.25	12.7875	18.275	74500	0.43	4.95	27	0.0190975	#DIV/0!	0.04035	528.225	7.38667	#DIV/0!	220.5	24.755	#DIV/0!	#DIV/0!	348.775	#DIV/0!	#DIV/0!	0.544	13.8	#DIV/0!	#DIV/0!	#DIV/0!	#DIV/0!	0.22725	685.25	29.25	1.375	1.83	1149.75	#DIV/0!	5.94667	7.50625	356.25	#DIV/0!	1079.5	707.75	1.04	39.925	1879.25	0.4175
	∆-D8	#DIV/0!	#DIV/0!	#DIV/0!	303	#DIV/0!	515.667	12.8	15.5333	76666.7	0.811	3.61	33.5	0.0141333	#DIV/0!	#DIV/0!	529.667	6.34667	#DIV/0!	110	30.7	16.4	81.9	207.333	#DIV/0!	#DIV/0!	#DIV/0!	#DIV/0!	#DIV/0!	#DIV/0!	#DIV/0!	#DIV/0!	0.203667	748.333	29.5667	1.38333	1.57667	454.667	#DIV/0!	5.205	0.474333	346.333	#DIV/0!	794	503.333	#DIV/0!	26.5	965.6	0.274333
	Wt-D10	#DIV/0!	#DIV/0!	1260	337	#DIV/0!	447.75	13.025	16.225	86525	#DIV/0!	4.565	16.7867	0.0286	#DIV/0!	#DIV/0!	668.5	6.4525	5.64	102.575	238.555	#DIV/0!	#DIV/0!	442.75	#DIV/0!	#DIV/0!	#DIV/0!	#DIV/0!	#DIV/0!	#DIV/0!	#DIV/0!	#DIV/0!	0.53525	721	27.025	1.3775	1.7825	526	0.00618	6.85	2.08	237.75	#DIV/0!	517.25	365.75	1.76	30.825	620.3	0.27275
	∆-D10	#DIV/0!	#DIV/0!	1329.33	448.75	#DIV/0!	519	10.3	13.15	103125	#DIV/0!	3.9975	6.81667	0.05905	#DIV/0!	#DIV/0!	1279	10.485	#DIV/0!	90.55	50.82	#DIV/0!	#DIV/0!	351.75	#DIV/0!	#DIV/0!	#DIV/0!	#DIV/0!	#DIV/0!	#DIV/0!	#DIV/0!	#DIV/0!	0.39425	1189	58.225	1.26225	2.9675	487.5	#DIV/0!	14.1575	2.153	362.75	4.13	471.75	333.75	1.04	26.35	987.625	0.427
		Fold ∆
Fold Change	UI	#DIV/0!	#DIV/0!	#DIV/0!	1	#DIV/0!	1	1	1	1	1	1	#DIV/0!	1	#DIV/0!	#DIV/0!	1	1	#DIV/0!	1	1	#DIV/0!	1	1	#DIV/0!	#DIV/0!	1	#DIV/0!	#DIV/0!	#DIV/0!	#DIV/0!	#DIV/0!	1	1	1	1	1	1	#DIV/0!	1	1	1	#DIV/0!	1	1	1	1	1	1
Relative to Uninfected	Wt-D8	#DIV/0!	#DIV/0!	#DIV/0!	0.812576	#DIV/0!	0.779147	1.21496	0.92298	1.43338	0.818658	1.02009	#DIV/0!	0.434281	#DIV/0!	#DIV/0!	0.483723	1.62166	#DIV/0!	3.59706	2.82591	#DIV/0!	#DIV/0!	1.18229	#DIV/0!	#DIV/0!	0.449587	#DIV/0!	#DIV/0!	#DIV/0!	#DIV/0!	#DIV/0!	1.36282	0.91611	1.25268	1.89003	0.88835	5.97273	#DIV/0!	0.940928	15.6543	0.699558	#DIV/0!	2.30786	1.73044	1.16071	4.32557	3.33822	1.26419
	∆-D8	#DIV/0!	#DIV/0!	#DIV/0!	0.739927	#DIV/0!	0.508422	1.21615	0.784512	1.47507	1.54403	0.743946	#DIV/0!	0.321395	#DIV/0!	#DIV/0!	0.485043	1.39334	#DIV/0!	1.79445	3.50457	#DIV/0!	1	0.702825	#DIV/0!	#DIV/0!	#DIV/0!	#DIV/0!	#DIV/0!	#DIV/0!	#DIV/0!	#DIV/0!	1.22139	1.00045	1.26624	1.90149	0.765372	2.3619	#DIV/0!	0.823576	0.989225	0.680085	#DIV/0!	1.69749	1.23064	#DIV/0!	2.87107	1.71525	0.830684
	Wt-D10	#DIV/0!	#DIV/0!	#DIV/0!	0.822955	#DIV/0!	0.441459	1.23753	0.819444	1.66474	#DIV/0!	0.940752	#DIV/0!	0.65037	#DIV/0!	#DIV/0!	0.612179	1.41658	#DIV/0!	1.67333	27.2323	#DIV/0!	#DIV/0!	1.50085	#DIV/0!	#DIV/0!	#DIV/0!	#DIV/0!	#DIV/0!	#DIV/0!	#DIV/0!	#DIV/0!	3.2099	0.963904	1.15739	1.89347	0.865291	2.73247	#DIV/0!	1.08386	4.33785	0.466863	#DIV/0!	1.10583	0.894254	1.96429	3.33965	1.10187	0.825889
	∆-D10	#DIV/0!	#DIV/0!	#DIV/0!	1.09585	#DIV/0!	0.511708	0.978622	0.664141	1.98413	#DIV/0!	0.823802	#DIV/0!	1.34281	#DIV/0!	#DIV/0!	1.17125	2.30187	#DIV/0!	1.47716	5.80137	#DIV/0!	#DIV/0!	1.19237	#DIV/0!	#DIV/0!	#DIV/0!	#DIV/0!	#DIV/0!	#DIV/0!	#DIV/0!	#DIV/0!	2.36432	1.58957	2.49358	1.73505	1.44053	2.53247	#DIV/0!	2.24011	4.49009	0.712322	#DIV/0!	1.00855	0.816015	1.16071	2.85482	1.75437	1.29296
[truncated: 12 more columns]
